# Supplementary material for: Antioxidant Activities and Phytochemicals of Leaf Extracts from 10 Native Rhododendron Species in Taiwan
Source: Hindawi journal article supplement (doi:10.1155/2014/283938), 2014-01-01
Supplement: f1 [file 283938.f1.pdf]

## Supplementary Data (S1–S9)

S1.  $^1\text{H}$ ,  $^{13}\text{C}$ , CD, and ESIMS data of (2*R*,3*S*)-catechin (**1**)

| Position | $\delta_{\text{H}}^{\text{a}}$ (multiplicity, $J = \text{Hz}$ ) | $\delta_{\text{C}}^{\text{a}}$ | CD <sup>b</sup>           | ESIMS $m/z$ | Reference |
|----------|-----------------------------------------------------------------|--------------------------------|---------------------------|-------------|-----------|
| 2        | 4.57 ( <i>d</i> , 7.4)                                          | 82.8                           | $[\theta]_{248} = 1335$ , | 290.1       | [16–18]   |
| 3        | 3.98 ( <i>ddd</i> , 5.6, 7.4, 8.2)                              | 68.8                           | $[\theta]_{278} = -9209$  |             |           |
| 4        | 2.84 ( <i>dd</i> , 5.6, 16.1)<br>2.51 ( <i>dd</i> , 8.2, 16.1)  | 28.5                           |                           |             |           |
| 5        | –                                                               | 156.9                          |                           |             |           |
| 6        | 5.94 ( <i>d</i> , 1.6)                                          | 96.3                           |                           |             |           |
| 7        | –                                                               | 157.6                          |                           |             |           |
| 8        | 5.86 ( <i>d</i> , 1.6)                                          | 95.5                           |                           |             |           |
| 9        | –                                                               | 157.8                          |                           |             |           |
| 10       | –                                                               | 100.9                          |                           |             |           |
| 1'       | –                                                               | 132.2                          |                           |             |           |
| 2'       | 6.84 ( <i>s</i> )                                               | 115.3                          |                           |             |           |
| 3'       | –                                                               | 146.2                          |                           |             |           |
| 4'       | –                                                               | 146.2                          |                           |             |           |
| 5'       | 6.72 ( <i>d</i> , 8.0)                                          | 116.1                          |                           |             |           |
| 6'       | 6.77 ( <i>d</i> , 8.0)                                          | 120.5                          |                           |             |           |

<sup>a</sup>Measured in CD<sub>3</sub>OD at 400 MHz. <sup>b</sup>Measured in CH<sub>3</sub>OH.
